# Supplementary material for: Utilizing diametrically opposite thermal quenching luminescence to achieve highly sensitive temperature measurement and anti-counterfeiting
Source: Royal Society of Chemistry journal article supplement (doi:10.1039/d3qi02063k), 2023-12-13
Supplement: d3qi02063k1.pdf [file d3qi02063k1.pdf]

## Supporting Information

**Utilizing diametrically reverse thermal quenching luminescence to achieve highly sensitive temperature measurement and anti-counterfeiting**

Haijie Guo,<sup>a</sup> Yaqi Chen,<sup>a</sup> Lei Wang,<sup>\*a</sup> Qiufeng Shi,<sup>a</sup> Cai'e Cui,<sup>a</sup> Ping Huang<sup>a</sup>, Jianwei Qiao<sup>\*a</sup>

<sup>a</sup> *College of Physics, Taiyuan University of Technology, Taiyuan 030024, P.R. China.*

\*E-mail: [wanglei\\_keke@163.com](mailto:wanglei_keke@163.com)

\*E-mail: [qiaojianwei@tyut.edu.cn](mailto:qiaojianwei@tyut.edu.cn)

**Keywords:** Phosphor, Optical thermometer, Luminescence intensity ratio, Eu<sup>3+</sup>, Anti-thermal quenching

**Table S1** The lattice parameters and the refinement results of CaYGaO<sub>4</sub>.

| <b>CaYGaO<sub>4</sub></b>          |                                      |
|------------------------------------|--------------------------------------|
| Crystal system                     | orthorhombic phase                   |
| Space group                        | Pnma (62)                            |
| Lattice parameters (Å)             | a= 11.34193(3) Å                     |
|                                    | b= 6.5871(2) Å                       |
|                                    | c= 5.2865(2) Å                       |
|                                    | $\alpha = \beta = \gamma = 90^\circ$ |
| Unit cell volume (Å <sup>3</sup> ) | V = 394.9626(2) Å <sup>3</sup>       |
| $R_p$                              | 4.19%                                |
| $R_{wp}$                           | 3.22%                                |
| $\chi^2$                           | 2.13                                 |

**Table S2** Ionic radii of different ligands in the host cations

| Ion              | Coordination number | r(Å)  | D <sub>r</sub>            |
|------------------|---------------------|-------|---------------------------|
| Ca <sup>2+</sup> | 8                   | 1.12  | 11.6%(Eu <sup>2+</sup> )  |
|                  |                     |       | 4.46%(Eu <sup>3+</sup> )  |
|                  |                     |       | 7.14%(Tb <sup>3+</sup> )  |
| Y <sup>3+</sup>  | 8                   | 1.019 | 22.67%(Eu <sup>2+</sup> ) |
|                  |                     |       | 5.00%(Eu <sup>3+</sup> )  |
|                  |                     |       | 2.06%(Tb <sup>3+</sup> )  |
| Ga <sup>3+</sup> | 6                   | 0.62  | --                        |
| Eu <sup>2+</sup> | 8                   | 1.25  | --                        |
| Eu <sup>3+</sup> | 8                   | 1.07  | --                        |
| Tb <sup>3+</sup> | 8                   | 1.04  | --                        |

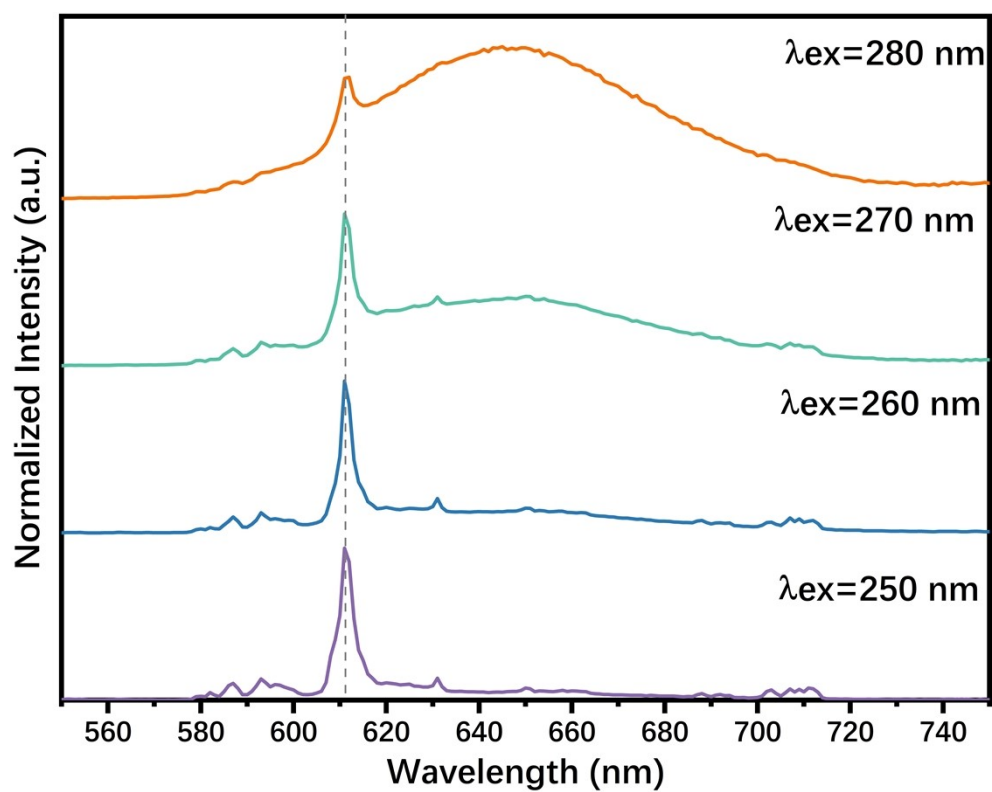

Fig. S1 PL spectra of CYGO:Eu<sup>2+</sup>/Eu<sup>3+</sup> under 250, 260, 270 and 280 nm wavelength excitation.

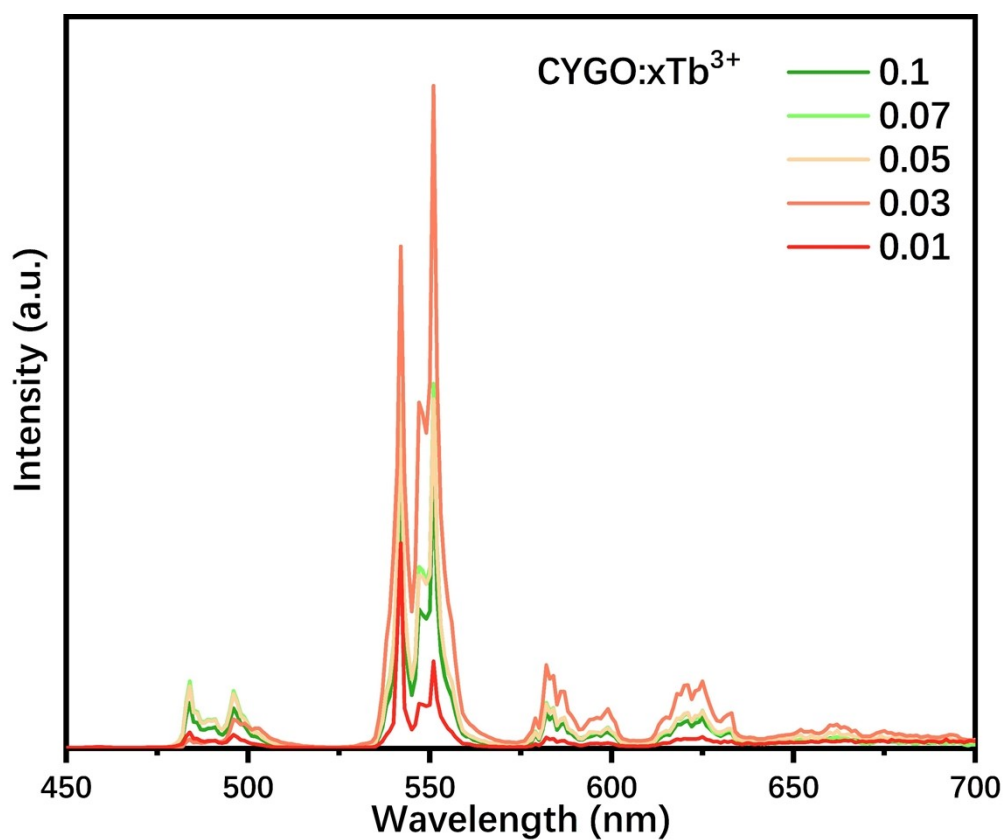

Fig. S2 PL spectra of CYGO:xTb<sup>3+</sup> (x = 0.01, 0.02, 0.05, 0.07 and 0.1) under 270 nm wavelength excitation.

**Table S3** The calculated CIE(x,y) values for CYGO:Eu<sup>2+</sup>/Eu<sup>3+</sup> and CYGO:Eu<sup>3+</sup>/Tb<sup>3+</sup> under different temperatures

| Temperature | CIE (CYGO:Eu <sup>2+</sup> /Eu <sup>3+</sup> ) | CIE (CYGO:Eu <sup>3+</sup> /Tb <sup>3+</sup> ) |
|-------------|------------------------------------------------|------------------------------------------------|
| 300 K       | (0.6675,0.3322)                                | (0.3972,0.5236)                                |
| 330 K       | (0.665,0.3348)                                 | (0.4056,0.5167)                                |
| 360 K       | (0.6616,0.3381)                                | (0.4178,0.506)                                 |
| 390 K       | (0.6578,0.3419)                                | (0.4324,0.4937)                                |
| 420 K       | (0.6547,0.3449)                                | (0.449,0.4801)                                 |
| 450 K       | (0.6508,0.3488)                                | (0.4723,0.4604)                                |
| 480 K       | (0.6476,0.3521)                                | (0.4887,0.447)                                 |
| 510 K       | (0.6449,0.3547)                                | (0.5042,0.434)                                 |
| 540 K       | (0.6423,0.3573)                                | (0.5182,0.4223)                                |
| 570 K       | (0.6403,0.3593)                                | (0.529,0.4137)                                 |

**Table S4** The calculated CIE(x,y) values for CYGO:Eu<sup>2+</sup>/Eu<sup>3+</sup> and CYGO:Eu<sup>3+</sup>/Tb<sup>3+</sup> under different excitation wavelengths

| Excitation wavelength | CIE (CYGO:Eu <sup>2+</sup> /Eu <sup>3+</sup> ) | CIE (CYGO:Eu <sup>3+</sup> /Tb <sup>3+</sup> ) |
|-----------------------|------------------------------------------------|------------------------------------------------|
| 240 nm                | (0.6522,0.3475)                                | (0.5318,0.4553)                                |
| 250 nm                | (0.6556,0.3441)                                | (0.5344,0.4562)                                |
| 260 nm                | (0.663,0.3368)                                 | (0.48,0.5072)                                  |
| 270 nm                | (0.6741,0.3256)                                | (0.4208,0.5632)                                |
| 280 nm                | (0.6809,0.3189)                                | (0.4036,0.58)                                  |
| 290 nm                | (0.6824,0.3174)                                | (0.4024,0.5818)                                |
